# Supplementary material for: MicroRNA-155 and Disease-Related Immunohistochemical Parameters in Cutaneous Melanoma
Source: MDPI journal article supplement (doi:10.3390/diagnostics13061205), 2023-03-22
Supplement: s1 [file s1]

**Supplementary Table S1.** The expression level of hsa-miR-155 in cancers.

| Cancer Subtype        | Source ID | Design                   | logFC | Expression Status |
|-----------------------|-----------|--------------------------|-------|-------------------|
| Adrenocortical cancer | TCGA_ACC  | High grade vs. low grade | 1.58  | UP                |
|                       | GSE143385 | Cancer vs. normal        | 0.78  | UP                |
| Biliary tract cancer  | TCGA_CHOL | Cancer vs. normal        | 1.31  | UP                |
| Bladder cancer        | TCGA_BLCA | Cancer vs. normal        | 0.99  | UP                |
| Brain cancer          | GSE41032  | Cancer vs. normal        | 3.11  | UP                |
|                       | GSE112264 | Blood                    | 2.83  | UP                |
|                       | GSE90603  | Cancer vs. normal        | 2.75  | UP                |
|                       | GSE158284 | Cancer vs. normal        | 2.65  | UP                |
|                       | GSE25631  | Cancer vs. normal        | 2.28  | UP                |
|                       | GSE138764 | Cancer vs. normal        | 2.24  | UP                |
|                       | GSE139031 | Blood                    | 1.94  | UP                |
|                       | GSE113740 | Blood                    | 1.47  | UP                |
|                       | GSE113486 | Blood                    | 1.42  | UP                |
|                       | GSE13030  | Cancer vs. normal        | 1.36  | UP                |
|                       | SRP262521 | Blood                    | 0.76  | UP                |
|                       | GSE100775 | Subtype1 vs. subtype2    | -0.36 | DOWN              |
|                       | SRP262521 | Blood                    | -1.41 | DOWN              |
| Breast cancer         | ERP120483 | Subtype1 vs. subtype2    | 10.35 | UP                |
|                       | SRP057497 | Cancer vs. normal        | 3.09  | UP                |
|                       | SRP154583 | Cancer vs. normal        | 2.71  | UP                |
|                       | SRP057497 | Cancer vs. normal        | 2.7   | UP                |
|                       | GSE45666  | Cancer vs. normal        | 2.27  | UP                |
|                       | SRP154583 | Cancer vs. normal        | 2.1   | UP                |
|                       | GSE45666  | Cancer vs. normal        | 2.07  | UP                |
|                       | SRP057497 | Cancer vs. normal        | 1.95  | UP                |
|                       | GSE40525  | Cancer vs. normal        | 1.97  | UP                |
|                       | GSE38167  | Cancer vs. normal        | 1.47  | UP                |
|                       | GSE113740 | Blood                    | 1.32  | UP                |
|                       | GSE2564   | High grade vs. low grade | 1.29  | UP                |
|                       | GSE113486 | Blood                    | 1.25  | UP                |
|                       | GSE4589   | Cancer vs. normal        | 1.22  | UP                |
|                       | GSE40525  | Cancer vs. normal        | 1.22  | UP                |
|                       | TCGA_BRCA | Cancer vs. normal        | 1.14  | UP                |
|                       | GSE40525  | Cancer vs. normal        | 1.07  | UP                |
|                       | TCGA_BRCA | Cancer vs. normal        | 1.07  | UP                |
|                       | GSE40525  | Cancer vs. normal        | 1.05  | UP                |
|                       | GSE106817 | Blood                    | 0.99  | UP                |
|                       | GSE86278  | Subtype1 vs. subtype2    | 0.83  | UP                |
|                       | GSE80038  | Cancer vs. normal        | 0.76  | UP                |
|                       | GSE86995  | Metastasis               | 0.72  | UP                |
|                       | GSE57897  | Cancer vs. normal        | 0.55  | UP                |
|                       | GSE155467 | Treatment                | 0.51  | UP                |

|                       |           |                          |       |      |
|-----------------------|-----------|--------------------------|-------|------|
|                       | TCGA_BRCA | High grade vs. low grade | 0.47  | UP   |
|                       | GSE22216  | High grade vs. low grade | 0.41  | UP   |
|                       | GSE57897  | Cancer vs. normal        | 0.34  | UP   |
|                       | GSE22216  | High grade vs. low grade | 0.29  | UP   |
|                       | GSE19783  | Subtype1 vs. subtype2    | -0.26 | DOWN |
|                       | GSE22216  | Subtype1 vs. subtype2    | -0.31 | DOWN |
|                       | TCGA_BRCA | High grade vs. low grade | -0.7  | DOWN |
|                       | SRP057497 | Subtype1 vs. subtype2    | -0.75 | DOWN |
|                       | SRP057497 | Subtype1 vs. subtype2    | -1.14 | DOWN |
|                       | ERP120483 | Subtype1 vs. subtype2    | -10.7 | DOWN |
| Colon cancer          | TCGA_COAD | Cancer vs. normal        | 1.99  | UP   |
|                       | TCGA_COAD | High grade vs. low grade | 1.59  | UP   |
|                       | GSE49246  | Cancer vs. normal        | 0.3   | UP   |
|                       | GSE59856  | Blood                    | 0.07  | UP   |
|                       | GSE49246  | Cancer vs. normal        | -0.23 | DOWN |
|                       | GSE18392  | Cancer vs. normal        | -0.25 | DOWN |
|                       | GSE18392  | High grade vs. low grade | -0.4  | DOWN |
|                       | GSE73487  | Cancer vs. normal        | -0.52 | DOWN |
|                       | GSE18392  | Cancer vs. normal        | -0.68 | DOWN |
|                       | TCGA_COAD | High grade vs. low grade | -2.66 | DOWN |
| Colorectal cancer     | TCGA_READ | High grade vs. low grade | 3.38  | UP   |
|                       | GSE113486 | Blood                    | 1.88  | UP   |
|                       | GSE113740 | Blood                    | 1.79  | UP   |
|                       | TCGA_READ | Cancer vs. normal        | 1.78  | UP   |
|                       | GSE112264 | Blood                    | 1.39  | UP   |
|                       | GSE106817 | Blood                    | 1.15  | UP   |
|                       | GSE56350  | Metastasis               | 1.13  | UP   |
|                       | TCGA_READ | High grade vs. low grade | 0.95  | UP   |
|                       | GSE30454  | Cancer vs. normal        | 0.85  | UP   |
|                       | GSE106817 | Blood                    | 0.56  | UP   |
|                       | GSE128446 | Cancer vs. normal        | 0.28  | UP   |
|                       | GSE38389  | Cancer vs. normal        | -0.19 | DOWN |
|                       | TCGA_READ | High grade vs. low grade | -3.38 | DOWN |
|                       | SRP056261 | Exosomes                 | -4.67 | DOWN |
| Endometrial cancer    | GSE35794  | Cancer vs. normal        | 3.17  | UP   |
|                       | TCGA_UCEC | Cancer vs. normal        | 1.22  | UP   |
| Esophageal cancer     | GSE97049  | Cancer vs. normal        | 1.91  | UP   |
|                       | GSE122497 | Blood                    | 1.17  | UP   |
|                       | GSE113486 | Blood                    | 0.99  | UP   |
|                       | GSE114110 | Cancer vs. normal        | 0.95  | UP   |
|                       | GSE106817 | Blood                    | 0.94  | UP   |
|                       | GSE122497 | Blood                    | 0.83  | UP   |
|                       | GSE6188   | Cancer vs. normal        | 0.61  | UP   |
|                       | TCGA_ESCA | High grade vs. low grade | -0.82 | DOWN |
|                       | TCGA_ESCA | Cancer vs. normal        | -0.83 | DOWN |
| Gallbladder carcinoma | GSE104165 | Cancer vs. normal        | 0.42  | UP   |

|                                |             |                          |       |      |
|--------------------------------|-------------|--------------------------|-------|------|
| Gastric cancer                 | GSE23739    | Cancer vs. normal        | 0.9   | UP   |
|                                | GSE26595    | Cancer vs. normal        | 0.79  | UP   |
|                                | GSE106817   | Blood                    | 0.57  | UP   |
|                                | GSE93415    | Cancer vs. normal        | -0.52 | DOWN |
|                                | TCGA_STAD   | High grade vs. low grade | -0.83 | DOWN |
| Gastrointestinal stromal tumor | GSE31741    | High grade vs. low grade | 0.92  | UP   |
| Head and neck cancer           | SRP078325   | Exosomes                 | 4.83  | UP   |
|                                | GSE124566   | Cancer vs. normal        | 1.81  | UP   |
|                                | SRP078325   | Exosomes                 | 1.49  | UP   |
|                                | TCGA_HNSC   | High grade vs. low grade | 0.61  | UP   |
|                                | GSE131166   | Subtype1 vs. subtype2    | 0.54  | UP   |
|                                | TCGA_HNSC   | Cancer vs. normal        | 0.5   | UP   |
|                                | TCGA_HNSC   | High grade vs. low grade | -0.4  | DOWN |
|                                | GSE33232    | Cancer vs. normal        | -0.7  | DOWN |
| Hepatocellular carcinoma       | GSE40744    | Cancer vs. normal        | 2.01  | UP   |
|                                | GSE19980    | Subtype1 vs. subtype2    | 1.29  | UP   |
|                                | GSE106817   | Blood                    | 0.85  | UP   |
|                                | GSE59856    | Blood                    | 0.11  | UP   |
|                                | GSE6857     | Cancer vs. normal        | 0.27  | UP   |
|                                | GSE32957    | Cancer vs. normal        | 2.01  | UP   |
|                                | GSE10694    | Cancer vs. normal        | -0.44 | DOWN |
|                                | TCGA_LIHC   | High grade vs. low grade | -1.17 | DOWN |
| Kidney cancer                  | TCGA_KIRC   | Cancer vs. normal        | 3.39  | UP   |
|                                | GSE11016    | Cancer vs. normal        | 2.56  | UP   |
|                                | GSE12105    | Cancer vs. normal        | 2.28  | UP   |
|                                | TCGA_KIRP   | Cancer vs. normal        | 1.76  | UP   |
|                                | GSE116251   | Cancer vs. normal        | 1.71  | UP   |
|                                | GSE95385    | Cancer vs. normal        | 1.42  | UP   |
|                                | TCGA_KICH   | High grade vs. low grade | 1.41  | UP   |
|                                | GSE47582    | Cancer vs. normal        | 1.24  | UP   |
|                                | TCGA_KIRC   | High grade vs. low grade | 0.99  | UP   |
|                                | TCGA_KICH   | Cancer vs. normal        | 0.75  | UP   |
|                                | TCGA_KIRC   | High grade vs. low grade | 0.67  | UP   |
|                                | TCGA_KIRC   | High grade vs. low grade | 0.65  | UP   |
|                                | GSE48137    | Blood                    | -0.25 | DOWN |
|                                | GSE33332    | Cancer vs. normal        | -3.19 | DOWN |
| Larynx cancer                  | GSE69127    | Subtype1 vs. subtype2    | -1.51 | DOWN |
| Leukemia                       | E_MTAB_1454 | Blood                    | 3.61  | UP   |
|                                | GSE51908    | Cancer vs. normal        | 2.84  | UP   |
|                                | GSE31629    | Cancer vs. normal        | 1.22  | UP   |
|                                | GSE2564     | Subtype1 vs. subtype2    | 1.07  | UP   |
|                                | E_MTAB_1454 | Blood                    | 0.89  | UP   |
|                                | GSE2399     | Cancer vs. normal        | -1.51 | DOWN |
| Lung cancer                    | TCGA_LUAD   | Cancer vs. normal        | 2.42  | UP   |
|                                | GSE135918   | Cancer vs. normal        | 1.82  | UP   |

|                              |           |                          |       |      |
|------------------------------|-----------|--------------------------|-------|------|
|                              | TCGA_LUAD | High grade vs. low grade | 1.62  | UP   |
|                              | GSE113486 | Blood                    | 1.13  | UP   |
|                              | GSE63805  | Cancer vs. normal        | 0.77  | UP   |
|                              | GSE106817 | Blood                    | 0.77  | UP   |
|                              | GSE74190  | Cancer vs. normal        | 0.68  | UP   |
|                              | GSE15008  | Cancer vs. normal        | 0.42  | UP   |
|                              | GSE135918 | Cancer vs. normal        | -0.13 | DOWN |
|                              | GSE29135  | Subtype1 vs. subtype2    | -0.29 | DOWN |
| Lymphoma                     | GSE2399   | Cancer vs. normal        | 4.43  | UP   |
|                              | GSE31377  | Cancer vs. normal        | 2.62  | UP   |
|                              | GSE2399   | Subtype1 vs. subtype2    | 1.87  | UP   |
|                              | GSE139031 | Blood                    | 1.6   | UP   |
|                              | GSE2399   | Cancer vs. normal        | 1.29  | UP   |
|                              | GSE2564   | Subtype1 vs. subtype2    | -1.01 | DOWN |
|                              | GSE31377  | Cancer vs. normal        | -1.14 | DOWN |
|                              | GSE16558  | Cancer vs. normal        | -1.29 | DOWN |
|                              | GSE2399   | Subtype1 vs. subtype2    | -1.31 | DOWN |
|                              | GSE37053  | Subtype1 vs. subtype2    | -1.45 | DOWN |
|                              | GSE2399   | Subtype1 vs. subtype2    | -1.62 | DOWN |
|                              | GSE29491  | Cancer vs. normal        | -1.89 | DOWN |
|                              | GSE37053  | Subtype1 vs. subtype2    | -2.66 | DOWN |
|                              | GSE22420  | Subtype1 vs. subtype2    | -3    | DOWN |
|                              | GSE17498  | Cancer vs. normal        | -4.69 | DOWN |
| Melanoma                     | GSE24996  | Cancer vs. normal        | 3.14  | UP   |
|                              | GSE18509  | Metastasis               | 2.15  | UP   |
|                              | GSE31568  | Blood                    | 0.77  | UP   |
|                              | SRP262521 | Blood                    | -1.34 | DOWN |
|                              | TCGA_SKCM | High grade vs. low grade | -1.85 | DOWN |
| Mesothelioma                 | GSE40345  | Cancer vs. normal        | 1.9   | UP   |
| Nasopharyngeal cancer        | GSE32960  | Cancer vs. normal        | -0.8  | DOWN |
|                              | GSE118613 | Blood                    | -2.14 | DOWN |
| Oral squamous cell carcinoma | GSE28100  | Cancer vs. normal        | 1.61  | UP   |
|                              | GSE137865 | Cancer vs. normal        | 1.34  | UP   |
|                              | GSE45238  | Cancer vs. normal        | 0.92  | UP   |
|                              | GSE113956 | Blood                    | -0.01 | DOWN |
|                              | GSE82064  | Cancer vs. normal        | -1.61 | DOWN |
| Ovarian cancer               | GSE83693  | Cancer vs. normal        | 1.3   | UP   |
|                              | GSE106817 | Blood                    | 1.01  | UP   |
|                              | GSE31801  | Blood                    | -0.16 | DOWN |
| Pancreatic cancer            | GSE140719 | Cancer vs. normal        | 4.48  | UP   |
|                              | GSE163031 | Cancer vs. normal        | 2.34  | UP   |
|                              | GSE106817 | Blood                    | 1.5   | UP   |
|                              | GSE25820  | Cancer vs. normal        | 1.42  | UP   |
|                              | GSE112264 | Blood                    | 1.34  | UP   |
|                              | GSE41369  | Cancer vs. normal        | 1.29  | UP   |
|                              | TCGA_PAAD | High grade vs. low grade | 1.03  | UP   |

|                                       |             |                          |       |      |
|---------------------------------------|-------------|--------------------------|-------|------|
|                                       | GSE71533    | Cancer vs. normal        | -0.12 | DOWN |
|                                       | GSE37406    | Treatment                | -0.77 | DOWN |
|                                       | GSE74562    | Treatment                | -1.36 | DOWN |
|                                       | TCGA_PAAD   | Cancer vs. normal        | -2.37 | DOWN |
| Prostate cancer                       | GSE21036    | Cancer vs. normal        | 0.61  | UP   |
|                                       | E_MTAB_3397 | Cancer vs. normal        | -0.26 | DOWN |
|                                       | GSE8126     | Cancer vs. normal        | -0.57 | DOWN |
|                                       | E_MTAB_408  | Cancer vs. normal        | -0.57 | DOWN |
| Sarcoma                               | GSE31045    | Cancer vs. normal        | 2.19  | UP   |
|                                       | GSE106817   | Blood                    | 1.45  | UP   |
|                                       | GSE113486   | Blood                    | 1.29  | UP   |
|                                       | GSE106817   | Blood                    | 0.81  | UP   |
|                                       | GSE65071    | Blood                    | 0.51  | UP   |
|                                       | GSE55625    | Cancer vs. normal        | 0.48  | UP   |
| Small intestinal neuroendocrine tumor | GSE103317   | Metastasis               | -0.6  | DOWN |
|                                       | GSE103317   | Cancer vs. normal        | -2    | DOWN |
| Testicular cancer                     | TCGA_TGCT   | High grade vs. low grade | -1.38 | DOWN |
| Thyroid cancer                        | TCGA_THCA   | High grade vs. low grade | 1.66  | UP   |
|                                       | GSE97070    | Cancer vs. normal        | -0.25 | DOWN |
|                                       | TCGA_THCA   | High grade vs. low grade | -0.61 | DOWN |
| Tonsil cancer                         | GSE75630    | Cancer vs. normal        | -0.31 | DOWN |

The absolute value of fold change at 1.0 was set to be a significant cutoff. The orange-highlighted values indicate significant upregulation, while the green-highlighted values indicate significant downregulation. Data source: dbDEMC v.3 (<https://www.biosino.org/dbDEMC/>), (last accessed on 30 January 2023).

**Supplementary Table S2.** Annotation of miR-155 gene targets in melanoma KEGG pathway.

| Symbol | Gene                                           | Function                                                                                                                                                                                                                                                                                                                                                                                                                                                                                                                                                                            |
|--------|------------------------------------------------|-------------------------------------------------------------------------------------------------------------------------------------------------------------------------------------------------------------------------------------------------------------------------------------------------------------------------------------------------------------------------------------------------------------------------------------------------------------------------------------------------------------------------------------------------------------------------------------|
| CDK4   | Cyclin-dependent kinase 4                      | a Ser/Thr-kinase component of cyclin D-CDK4 complexes that phosphorylate and inhibit members of the retinoblastoma (RB) protein family including RB1 and regulate the cell-cycle progression during G(1)/S transition                                                                                                                                                                                                                                                                                                                                                               |
| EGFR   | Epidermal growth factor receptor               | Receptor tyrosine kinase binding ligands of the EGF family and activating several signaling cascades to convert extracellular cues into appropriate cellular responses. Known ligands include EGF, TGFA/TGF- $\alpha$ , amphiregulin, epigen/EPGN, BTC/betacellulin, epiregulin/EREG and HBEGF/heparin-binding EGF. Ligand binding triggers receptor homo- and/or heterodimerization and autophosphorylation on key cytoplasmic residues. The phosphorylated receptor recruit adapter proteins like GRB2 which in turn activates complex downstream signaling cascades.             |
| CDKN2A | Cyclin-dependent kinase inhibitor 2A           | Acts as a negative regulator of the proliferation of normal cells by interacting strongly with CDK4 and CDK6. This inhibits their ability to interact with cyclins D and to phosphorylate the retinoblastoma protein                                                                                                                                                                                                                                                                                                                                                                |
| MITF   | Microphthalmia-associated transcription factor | Transcription factor that regulates the expression of genes with essential roles in cell differentiation, proliferation and survival. Binds to M-boxes (5'-TCATGTG-3') and symmetrical DNA sequences (E-boxes) (5'-CACGTG-3') found in the promoters of target genes, such as BCL2 and tyrosinase (TYR). Plays an important role in melanocyte development by regulating the expression of tyrosinase (TYR) and tyrosinase-related protein 1 (TYRP1). Plays a critical role in the differentiation of various cell types, such as neural crest-derived melanocyte.                  |
| CCND1  | G1/S-specific cyclin-D1                        | Regulatory component of the cyclin D1-CDK4 (DC) complex that phosphorylates and inhibits members of the retinoblastoma (RB) protein family including RB1 and regulates the cell-cycle during G(1)/S transition. Phosphorylation of RB1 allows dissociation of the transcription factor E2F from the RB/E2F complex and the subsequent transcription of E2F target genes which are responsible for the progression through the G(1) phase. Hypophosphorylates RB1 in early G(1) phase. Cyclin D-CDK4 complexes are major integrators of various mitogenic and antimitogenic signals. |
| E2F3   | Transcription factor E2F3                      | Transcription activator that binds DNA cooperatively with DP proteins through the E2 recognition site, 5'-TTTC[CG]CGC- 3' found in the promoter region of a number of genes whose products are involved in cell cycle regulation or in DNA replication. The DRTF1/E2F complex functions in the control of cell-cycle progression from G1 to S phase. E2F3 binds specifically to RB1 in a cell-cycle dependent manner.                                                                                                                                                               |
| PIK3R1 | Phosphoinositide-3-kinase regulatory           | Phosphatidylinositol 3-kinase regulatory subunit $\alpha$ ; Binds to activated (phosphorylated) protein-Tyr kinases, through its SH2 domain, and acts as an adapter, mediating the association of the p110 catalytic unit to the plasma membrane. Necessary for the insulin-                                                                                                                                                                                                                                                                                                        |

|       |                                           |                                                                                                                                                                                                                                                                                                                                                                                                                                                                                                                                                                                          |
|-------|-------------------------------------------|------------------------------------------------------------------------------------------------------------------------------------------------------------------------------------------------------------------------------------------------------------------------------------------------------------------------------------------------------------------------------------------------------------------------------------------------------------------------------------------------------------------------------------------------------------------------------------------|
|       | subunit<br>alpha/beta/delta               | stimulated increase in glucose uptake and glycogen synthesis in insulin-sensitive tissues. Plays an important role in signaling in response to FGFR1, FGFR2, FGFR3, FGFR4, KITLG/SCF, KIT, PDGFRA and PDGFRB. Likewise, plays a role in ITGB2 signaling.                                                                                                                                                                                                                                                                                                                                 |
| FGF9  | Fibroblast growth factor 9                | Plays an important role in the regulation of embryonic development, cell proliferation, cell differentiation and cell migration. May have a role in glial cell growth and differentiation during development, gliosis during repair and regeneration of brain tissue after damage, differentiation and survival of neuronal cells, and growth stimulation of glial tumors; Belongs to the heparin-binding growth factors family                                                                                                                                                          |
| AKT3  | RAC-gamma serine/threonine-protein kinase | AKT3 is one of 3 closely related serine/threonine- protein kinases (AKT1, AKT2 and AKT3) called the AKT kinase, and which regulate many processes including metabolism, proliferation, cell survival, growth and angiogenesis. This is mediated through serine and/or threonine phosphorylation of a range of downstream substrates. Over 100 substrate candidates have been reported so far, but for most of them, no isoform specificity has been reported. AKT3 is the least studied AKT isoform.                                                                                     |
| CDKN1 | Cyclin-dependent kinase 1                 | Plays a key role in the control of the eukaryotic cell cycle by modulating the centrosome cycle as well as mitotic onset; promotes G2-M transition and regulates G1 progress and G1-S transition via association with multiple interphase cyclins. Required in higher cells for entry into S-phase and mitosis. Phosphorylates PARVA/actopaxin, APC, AMPH, APC, BARD1, Bcl- xL/BCL2L1, BRCA2, CALD1, CASP8, CDC7, CDC20, CDC25A, CDC25C, CC2D1A, CENPA, CSNK2 proteins/CKII, FZR1/CDH1, CDK7, CEBPB, CHAMP1, DMD/dystrophin, EEF1 proteins/EF-1, EZH2, KIF11/EG5, EGFR, FANCG, FOS, etc. |
| FGF7  | Fibroblast growth factor 7                | Plays an important role in the regulation of embryonic development, cell proliferation and cell differentiation. Required for normal branching morphogenesis. Growth factor active on keratinocytes. Possible major paracrine effector of normal epithelial cell proliferation; Belongs to the heparin-binding growth factors family                                                                                                                                                                                                                                                     |
| MDM2  | E3 ubiquitin-protein ligase Mdm2          | E3 ubiquitin-protein ligase that mediates ubiquitination of p53/TP53, leading to its degradation by the proteasome. Inhibits p53/TP53- and p73/TP73-mediated cell cycle arrest and apoptosis by binding its transcriptional activation domain. Also acts as a ubiquitin ligase E3 toward itself and ARRB1. Permits the nuclear export of p53/TP53. Promotes proteasome-dependent ubiquitin-independent degradation of retinoblastoma RB1 protein. Inhibits DAXX-mediated apoptosis by inducing its ubiquitination and degradation. Component of the TRIM28/KAP1-MDM2-p53/TP53            |
